# Supplementary material for: Graphene loading water-soluble phthalocyanine for dual-modality photothermal/photodynamic therapy via a one-step method
Source: Royal Society of Chemistry journal article supplement (doi:10.1039/c4tb01038h), 2014-01-01
Supplement: c4tb01038h1.pdf [file c4tb01038h1.pdf]

# **Graphene loading water-soluble phthalocyanine for dual-modality photothermal/photodynamic therapy via a one-step method**

Bang-Ping Jiang,<sup>‡</sup> Lan-Fang Hu,<sup>‡</sup> Dong-Jin Wang, Shi-Chen Ji,  
Xing-Can Shen\* and Hong Liang\*

*Ministry of Education Key Laboratory for the Chemistry and Molecular Engineering of Medicinal Resources, School of Chemistry and Pharmaceutical Science, Guangxi Normal University, Guilin, 541004, P. R. China Tel: (+86) 773-5846273; E-mail: xcshen@mailbox.gxnu.edu.cn; hliang@gxnu.edu.cn*

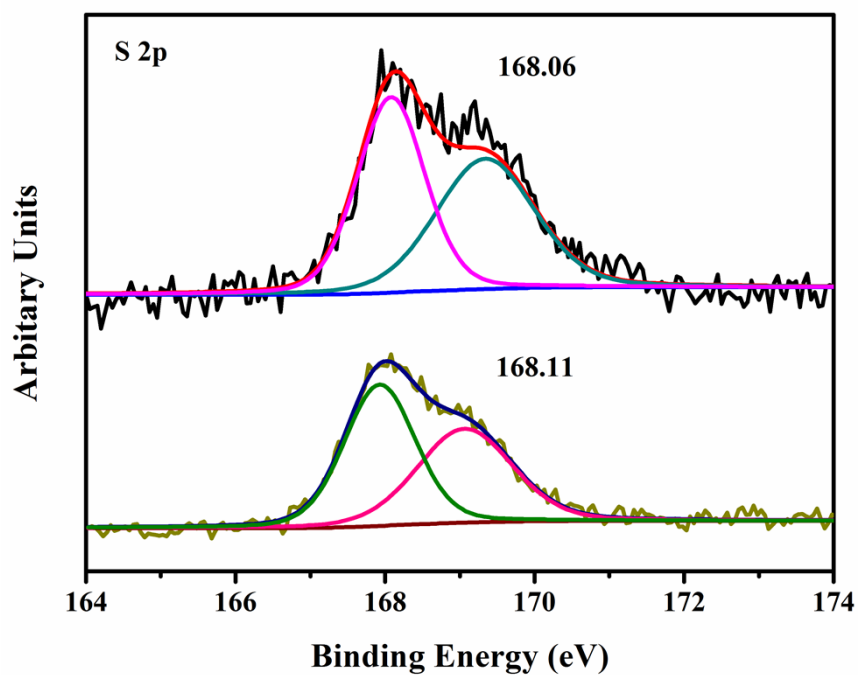

**Fig. S1.** High resolution S 2p spectra. The upper spectra belong to TSCuPc complex and the lower to GR-TSCuPc.

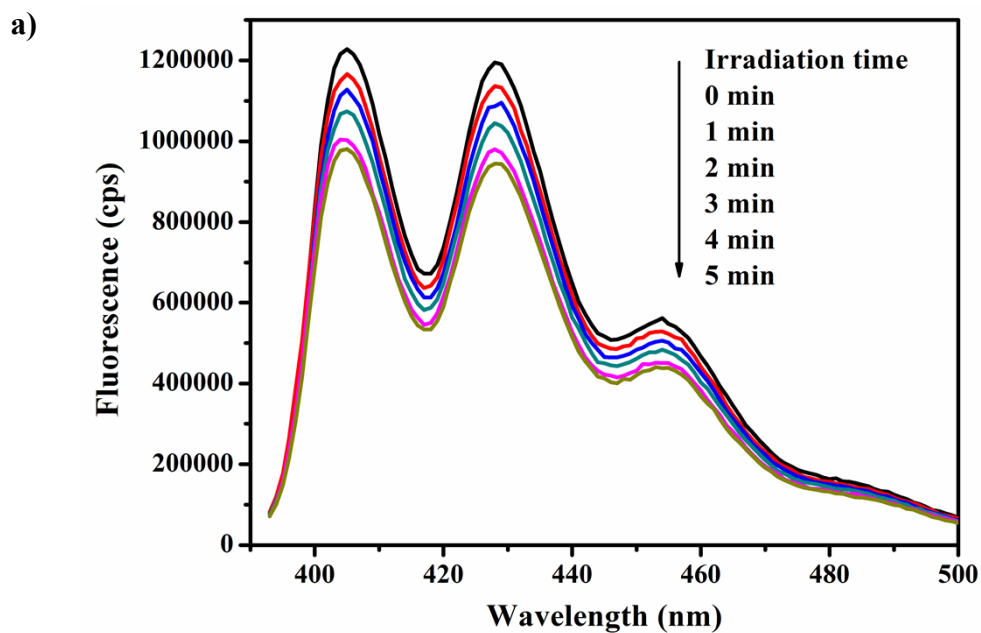

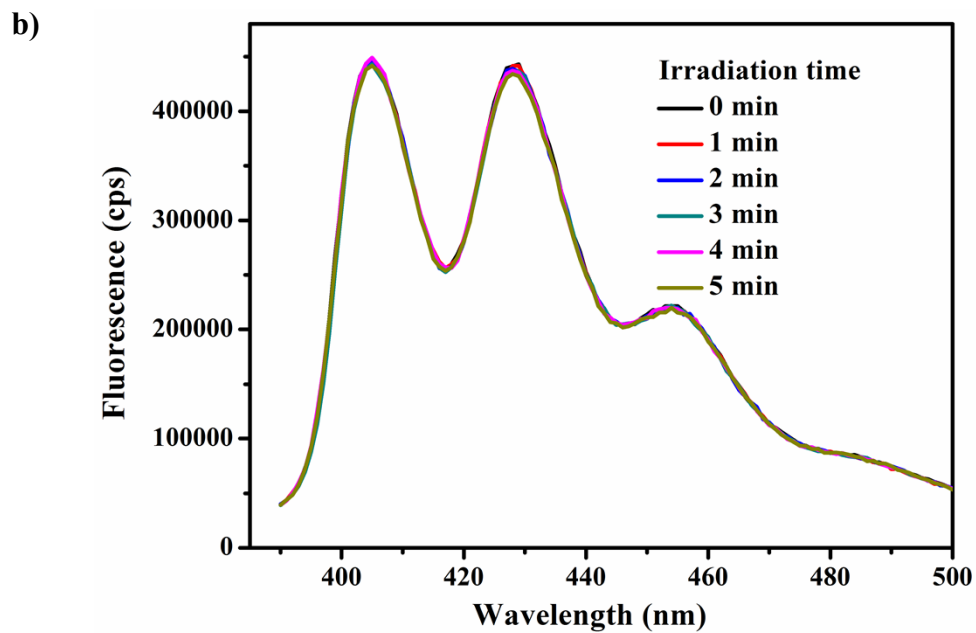

**Fig. S2.** Fluorescence spectra of the mixtures of (a) free TSCuPc with ADPA and (b) GR-TSCuPc with ADPA after irradiation at 650 nm for 0, 1, 2, 3, 4, 5 min.  $\lambda_{\text{exc}}=376$  nm.
